# Supplementary material for: Oxidation of phenols by the excited state of an osmium(vi) nitrido complex
Source: Royal Society of Chemistry journal article supplement (doi:10.1039/d4qi03144j), 2025-01-01
Supplement: d4qi03144j1.pdf [file d4qi03144j1.pdf]

## Supporting information

### Oxidation of Phenols by the Excited State of an Osmium(VI) Nitrido Complex

---

<sup>a</sup> Key Laboratory of Optoelectronic Chemical Materials and Devices (Ministry of Education), School of Optoelectronic Materials and Technology, Jiangnan University, Wuhan, 430056 China. [xiangjing35991@sohu.com](mailto:xiangjing35991@sohu.com).

<sup>b</sup> Hebei Key Laboratory of Heterocyclic Compounds, Handan University, Handan 056005, Hebei Province, China.

<sup>c</sup> Department of Chemistry, City University of Hong Kong, Tat Chee Avenue, Kowloon Tong, Hong Kong, P. R. China. [bhtclau@cityu.edu.hk](mailto:bhtclau@cityu.edu.hk)

Yu-Zhong Lu,<sup>a</sup> Li-Xin Wang,<sup>a</sup> Rui-Yue Qi,<sup>a,b</sup> Jing Xiang,<sup>\*,a</sup> Ji-Yan Liu,<sup>\*,a</sup> Tai-Chu Lau<sup>\*,a,c</sup>

## Table of Contents

|            |                                                                                                                                                                                                                                                                                        |    |
|------------|----------------------------------------------------------------------------------------------------------------------------------------------------------------------------------------------------------------------------------------------------------------------------------------|----|
|            | Experimental section                                                                                                                                                                                                                                                                   | S1 |
| Figure S1  | ESI/MS of reaction of <b>OsN</b> with 10 equiv. 2,4,6-Me <sub>3</sub> C <sub>6</sub> H <sub>2</sub> OH.                                                                                                                                                                                | S2 |
| Figure S2  | ESI/MS of <b>3b</b> .                                                                                                                                                                                                                                                                  | S2 |
| Figure S3  | ESI/MS of <b>4a</b> .                                                                                                                                                                                                                                                                  | S2 |
| Figure S4  | ESI/MS of <b>4b</b> .                                                                                                                                                                                                                                                                  | S3 |
| Figure S5  | UV/vis spectra of <b>5</b> and <b>OsNH<sub>3</sub></b> .                                                                                                                                                                                                                               | S3 |
| Figure S6  | UV/vis spectra of (a) osmium(II) <b>1a-3a</b> and (b) osmium(IV) products <b>1b-3b</b> , <b>4a</b> .                                                                                                                                                                                   | S3 |
| Figure S7  | IR spectra of <b>4a</b> and <b>4b</b>                                                                                                                                                                                                                                                  | S4 |
| Table S1   | IR data of <b>1-4</b> .                                                                                                                                                                                                                                                                | S4 |
| Figure S8  | <sup>1</sup> H NMR (400 MHz, CDCl <sub>3</sub> ) spectrum of (PPh <sub>4</sub> ) <b>3b</b> .                                                                                                                                                                                           | S5 |
| Figure S9  | <sup>1</sup> H NMR (400 MHz, CDCl <sub>3</sub> ) spectrum of (PPh <sub>4</sub> ) <b>4a</b> .                                                                                                                                                                                           | S5 |
| Figure S10 | UV/vis spectral changes for the photoreaction of <b>OsN*</b> ( $3.3 \times 10^{-5}$ mol/L) with 100 equiv. of 4-X-phenols; The inset shows the time-trace of absorbance at 450 nm for the photoreactions of <b>OsN</b> with 4-X-phenols.                                               | S6 |
| Figure S11 | The reaction of <b>OsN*</b> ( $2.5 \times 10^{-3}$ M) with phenol and d <sup>6</sup> -phenol (2.5 mM) showing the similar UV/Vis changes with nearly the same initial reaction rate ( <i>R</i> ) of $2.24 \times 10^{-3}$ and $2.39 \times 10^{-3}$ , respectively.                    | S7 |
| Figure S12 | UV/vis spectral changes for the photoreaction of <b>OsN</b> ( $1 \times 10^{-4}$ M) with phenol ( $1 \times 10^{-3}$ M) and sodium phenoxide ( $1 \times 10^{-3}$ M) in MeCN. Inset shows the time-trace absorbance at 430 nm. $R_1=1.71 \times 10^{-5}$ , $R_2=1.02 \times 10^{-3}$ . | S8 |
| Table S2   | Crystal data and structure refinement details for <b>1b</b> , <b>2a</b> , <b>3b</b> and <b>4a</b> .                                                                                                                                                                                    | S9 |

**Physical Measurements and Instrumentation.** <sup>1</sup>H NMR spectra were recorded on a Bruker AV400 (400 MHz) FT-NMR spectrometer. Chemical shifts ( $\delta$ , ppm) are reported relative to tetramethylsilane (Me<sub>4</sub>Si). Elemental analysis was performed on an Elementar Vario MICRO Cube elemental analyzer. IR spectra of the solid samples as KBr discs were obtained within the range 4000–400 cm<sup>-1</sup> on an AVATAR 360 FTIR spectrometer. All of the electronic absorption spectra were recorded on a Hewlett–Packard 8453 or Hewlett–Packard 8452A diode-array spectrophotometer. Electrospray ionization mass spectrometry (ESI-MS) was performed using a PE-SCIEX API 365 triple quadrupole mass spectrometer.

**X-ray Crystallography.** The crystal structures were determined on an Oxford Diffraction Gemini S Ultra X-ray single-crystal diffractometer using graphite-monochromated Mo/K<sub>a</sub> radiation ( $\lambda = 0.71073$  Å) for **1b**, **2a**, **3b**, **4a**, respectively. The structures were solved by using direct methods with the Olex2 for **2a** and SHELX2014 program for **3b**, **4a**.<sup>1,2</sup> Crystal data and structure refinement details for compounds **1b**, **2a**, **3b** and **4a** are summarized in Table S1. The positions of the other non-hydrogen atoms were located after refinement by full matrix least-squares by using the SHELXL-2014/7 program.<sup>3</sup> In the final stage of the least-squares refinement, all non-hydrogen atoms were refined anisotropically. H atoms were generated by SHELXL-2014/7 program. Crystallographic data (including structure factors) of the structures reported in this paper have been deposited to the Cambridge Crystallographic Data Centre (CCDC) with the depository numbers CCDC **2406139-2406142**.

*Reference:*

[1] (a)Sheldrick, G. M. SHELX-97: Programs for Crystal Structure Analysis, release 97-2, University of Gottingen, Germany, 1997. (b)Sheldrick, G. SHELXT - Integrated space-group and crystal-structure determination. *Acta Crystallographica Section A* 2015, **71**, 3-8.

[2] Dolomanov, O. V.; Bourhis, L. J.; Gildea, R. J.; Howard, J. A. K.; Puschmann, H. OLEX2: a complete structure solution, refinement and analysis program. *J. Appl. Crystallogr.* 2009, **42**, 339-341.

[3] Sheldrick, G. Crystal structure refinement with SHELXL. *Acta Crystallographica Section C* 2015, **71**, 3-8.

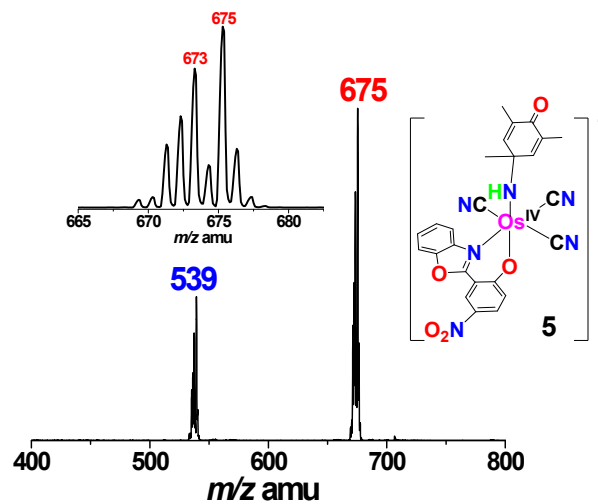

**Figure S1.** ESI/MS (-ve mode) for the reaction of OsN with 10 equiv. 2,4,6-Me<sub>3</sub>C<sub>6</sub>H<sub>2</sub>OH.

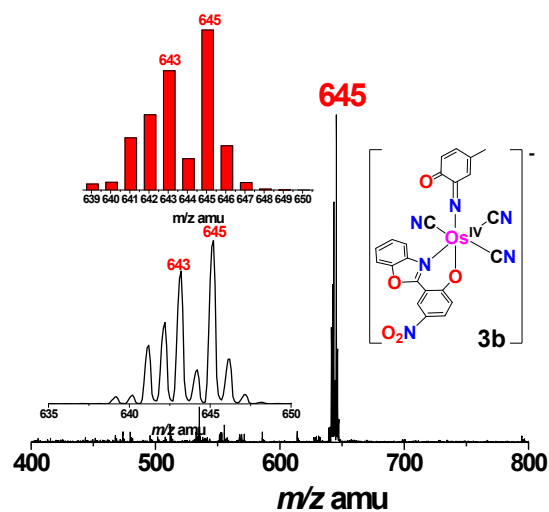

**Figure S2.** ESI/MS (-ve mode) of 3b in MeOH.

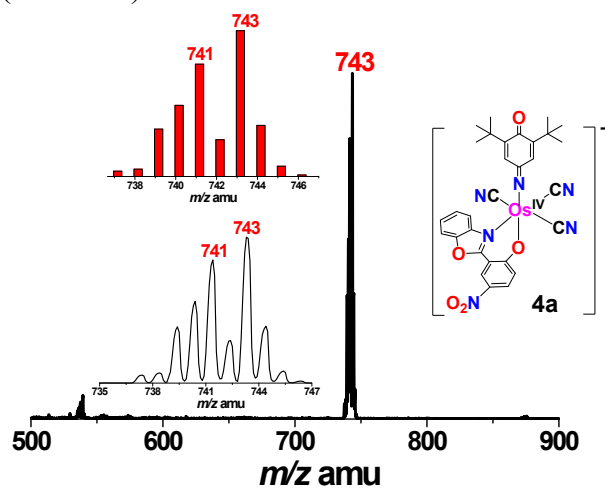

**Figure S3.** ESI/MS (-ve mode) of 4a in MeOH.

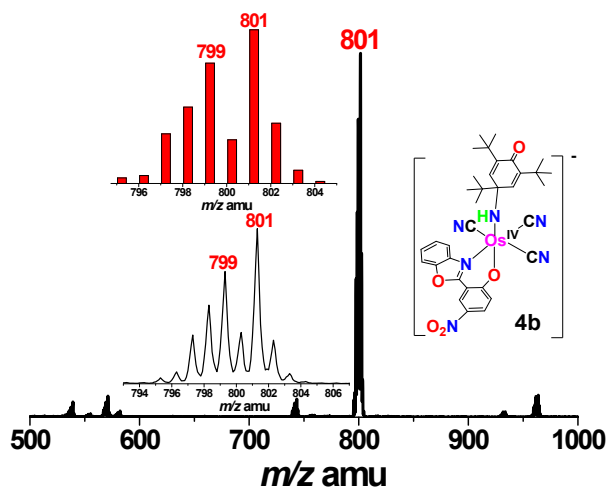

Figure S4. ESI/MS (-ve mode) of **4b** in MeOH.

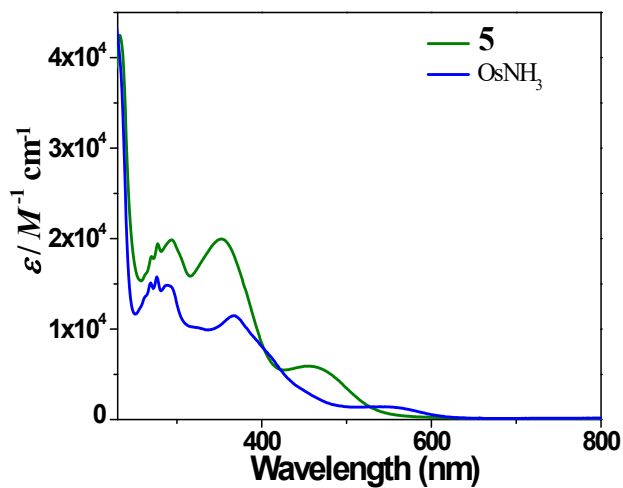

Figure S5. UV/vis spectra of  $(PPh_4)5$  and  $OsNH_3$ .

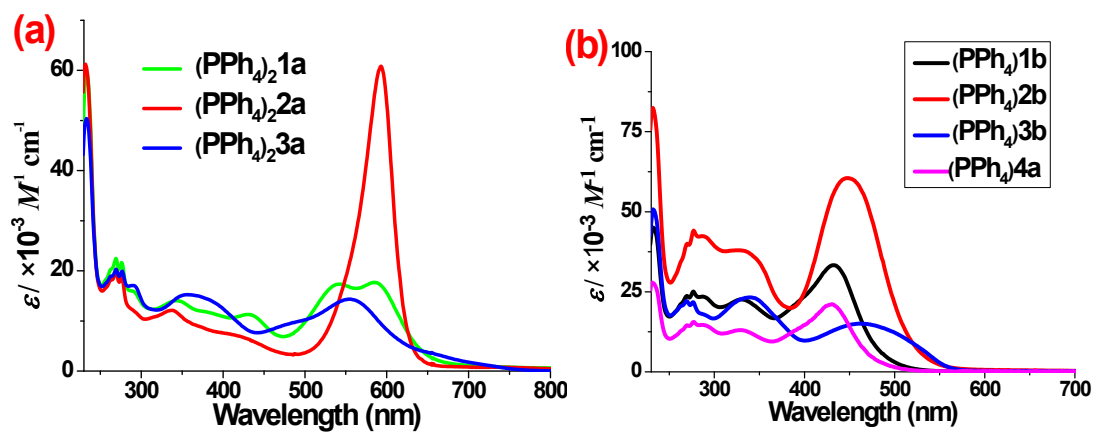

Figure S6. UV/vis spectra of (a) osmium(II) **1a-3a** and (b) osmium(IV) products **1b-3b, 4a**.

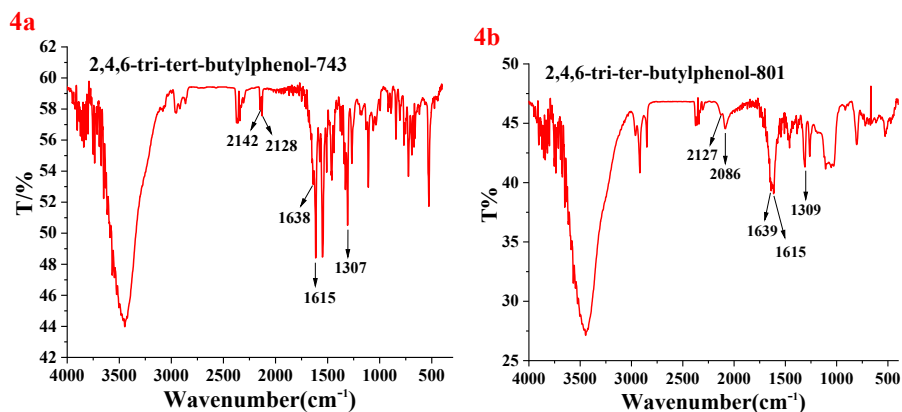

**Figure S7.** IR spectra of complexes (PPh<sub>4</sub>)**4a** and (PPh<sub>4</sub>)**4b**.

**Table S1.** Selected IR data of **1-5**.

|           | Selected IR (cm <sup>-1</sup> ) |                               |                   |                   |
|-----------|---------------------------------|-------------------------------|-------------------|-------------------|
|           | $\nu(\text{N-H})$               | $\nu(\text{C}\equiv\text{N})$ | $\nu(\text{C=O})$ | $\nu(\text{C=N})$ |
| <b>1a</b> | 3248                            | 2096,2070                     | 1645              | 1609              |
| <b>1b</b> | /                               | 2145,2135                     | 1630              | 1611              |
| <b>2a</b> | 3235                            | 2108,2082                     | 1638              | 1609              |
| <b>2b</b> | /                               | 2153,2141                     | 1639              | 1614              |
| <b>3a</b> | 3253                            | 2125,2086                     | 1645              | 1612              |
| <b>3b</b> | /                               | 2139,2130                     | 1649              | 1614              |
| <b>4a</b> | /                               | 2142,2128                     | 1638              | 1615              |
| <b>5</b>  | 3247                            | 2135,2127                     | /                 | 1610              |

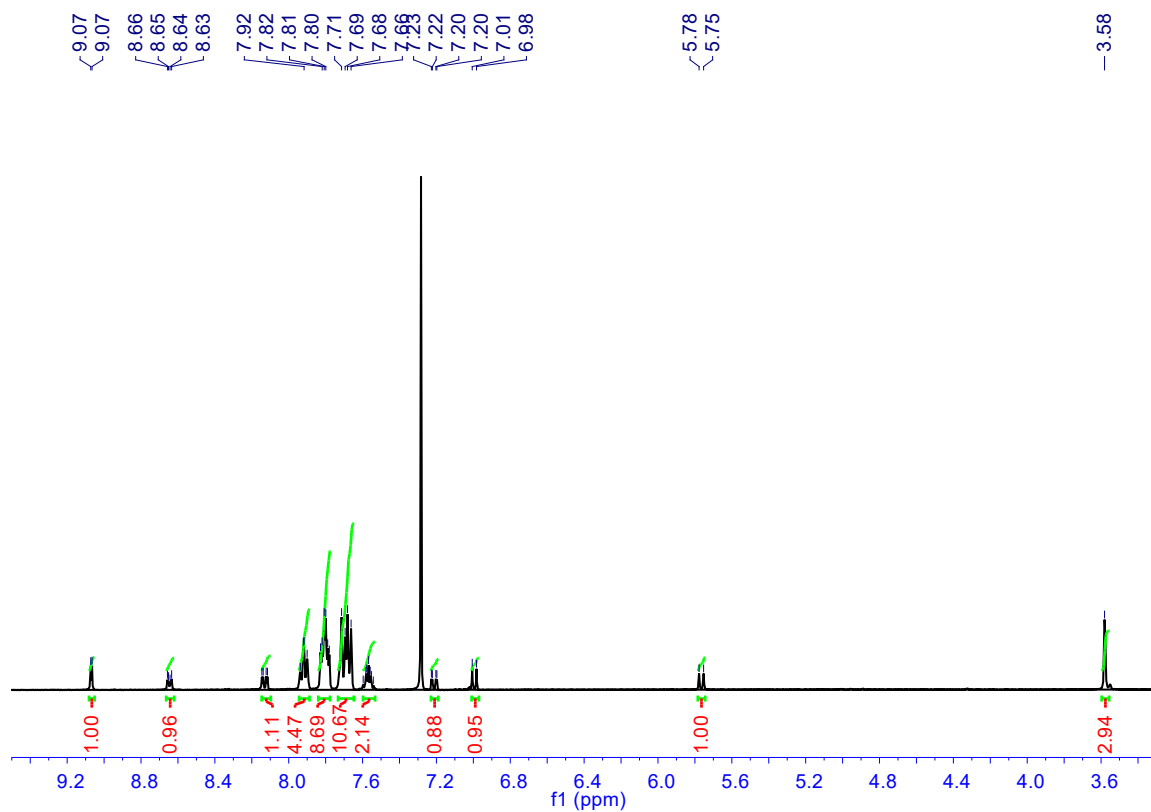

**Figure S8.**  $^1\text{H}$  NMR (400 MHz,  $\text{CDCl}_3$ ) spectrum of  $(\text{PPh}_4)_3\text{b}$ .

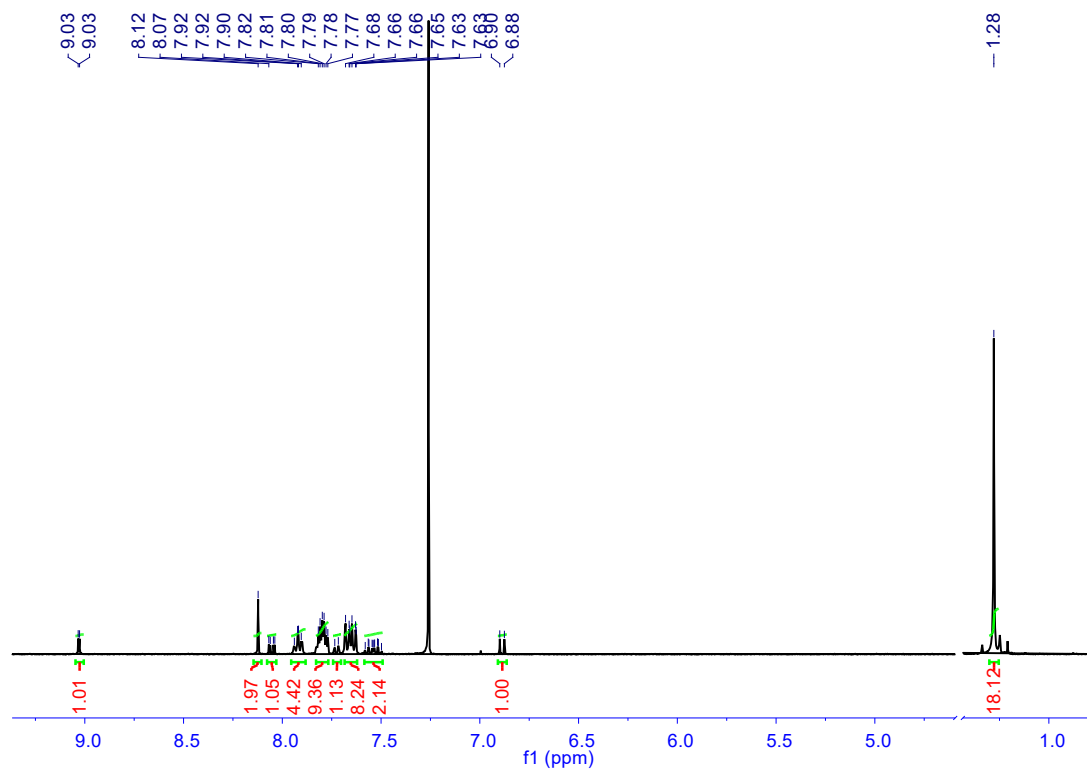

**Figure S9.**  $^1\text{H}$  NMR (400 MHz,  $\text{CDCl}_3$ ) spectrum of  $(\text{PPh}_4)_4\text{a}$ .

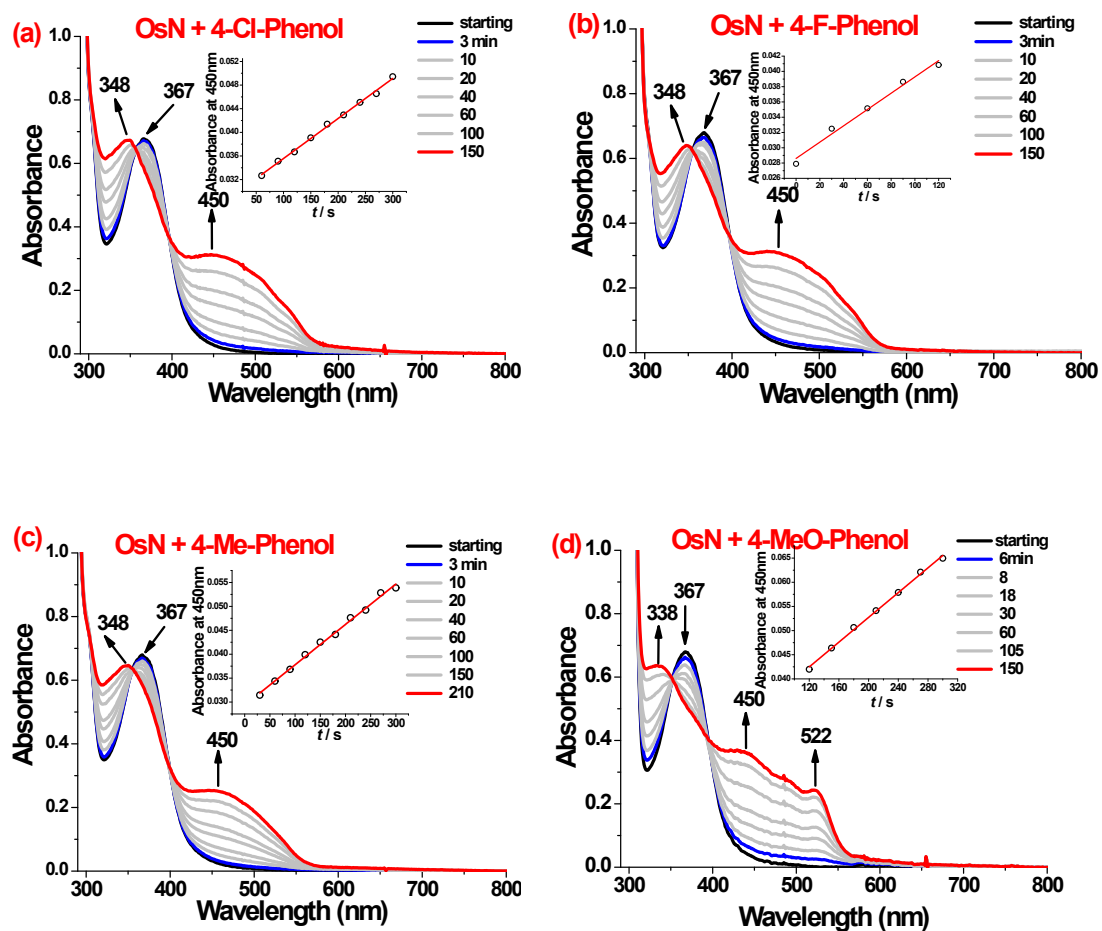

**Figure S10.** UV/vis spectral changes for the photoreaction of  $\text{OsN}^*$  ( $2.5 \times 10^{-5}$  M) with 100 equiv. of 4-X-phenols; The inset shows the time-trace of absorbance at 450 nm for the photoreaction of  $\text{OsN}^*$  with 4-X-phenols.



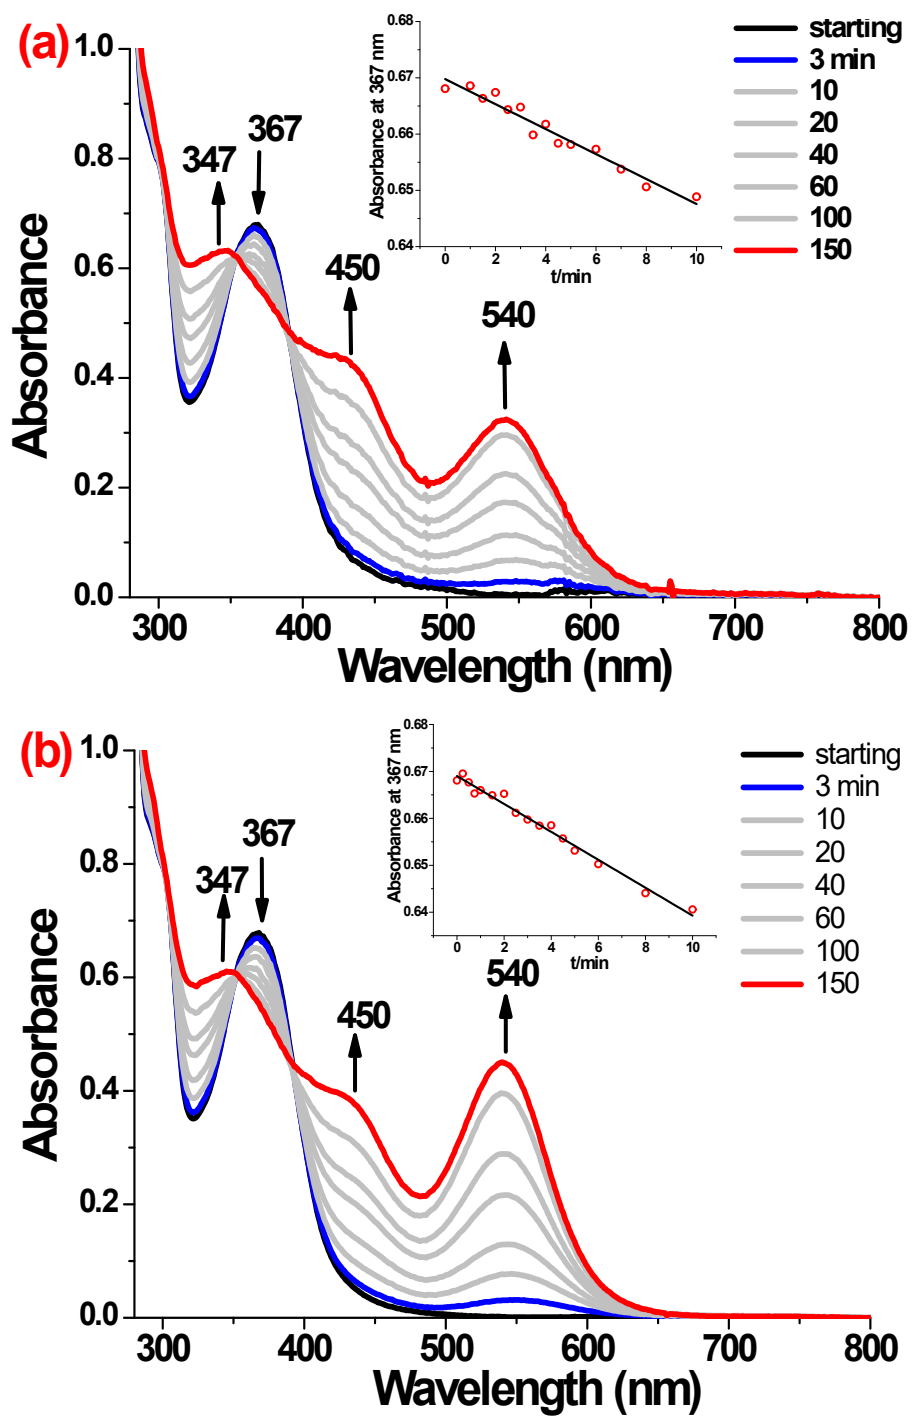

**Figure S11.** The UV/vis spectral change for the photoreaction of OsN ( $2.5 \times 10^{-5}$  M) with (a) phenol and (b)  $d^6$ -phenol ( $2.5 \times 10^{-3}$  M).

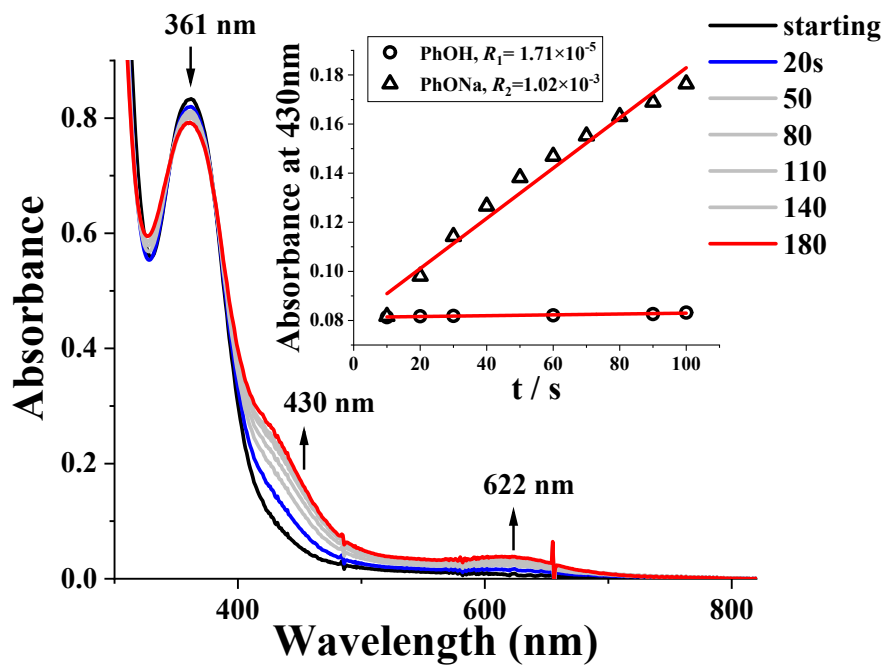

**Figure S12.** UV/vis spectral changes for the photoreaction of **OsN** ( $1 \times 10^{-4}$  M) with phenol ( $1 \times 10^{-3}$  M) and sodium phenoxide ( $1 \times 10^{-3}$  M) in MeCN. Inset shows the time-trace absorbance at 430 nm.  $R_1 = 1.71 \times 10^{-5}$ ,  $R_2 = 1.02 \times 10^{-3}$ .

**Table S2.** Crystal data and structure refinement details for (PPh<sub>4</sub>)**1b**, (PPh<sub>4</sub>)<sub>2</sub>**2a**, (PPh<sub>4</sub>)**3b** and (PPh<sub>4</sub>)**4a**.

|                                                   | (PPh <sub>4</sub> ) <b>1b</b>                                     | (PPh <sub>4</sub> ) <sub>2</sub> <b>2a</b>                                                     | (PPh <sub>4</sub> ) <b>3b</b>                                     | (PPh <sub>4</sub> ) <b>4a</b>                                     |
|---------------------------------------------------|-------------------------------------------------------------------|------------------------------------------------------------------------------------------------|-------------------------------------------------------------------|-------------------------------------------------------------------|
| Formula                                           | C <sub>48</sub> H <sub>35</sub> N <sub>6</sub> O <sub>5</sub> OsP | C <sub>72</sub> H <sub>60</sub> Cl <sub>2</sub> N <sub>6</sub> O <sub>8</sub> OsP <sub>2</sub> | C <sub>47</sub> H <sub>33</sub> N <sub>6</sub> O <sub>5</sub> OsP | C <sub>54</sub> H <sub>47</sub> N <sub>6</sub> O <sub>5</sub> OsP |
| <i>Mr</i>                                         | 996.99                                                            | 1460.30                                                                                        | 982.96                                                            | 1081.14                                                           |
| <i>T</i> /K                                       | 100 (1)                                                           | 100 (1)                                                                                        | 296 (2)                                                           | 193(2)                                                            |
| Crystal syst                                      | Monoclinic                                                        | Triclinic                                                                                      | Triclinic                                                         | Triclinic                                                         |
| Space group                                       | P2 <sub>1</sub> /C                                                | P-1                                                                                            | P-1                                                               | P-1                                                               |
| <i>a</i> /Å                                       | 8.1639(2)                                                         | 11.9163(4)                                                                                     | 12.2391 (19)                                                      | 13.1913(5)                                                        |
| <i>b</i> /Å                                       | 15.8744(6)                                                        | 13.2565 (4)                                                                                    | 12.597 (3)                                                        | 13.8662(5)                                                        |
| <i>c</i> /Å                                       | 34.8653(13)                                                       | 20.5061(4)                                                                                     | 14.997 (2)                                                        | 15.8504(6)                                                        |
| <i>α</i> , (°)                                    | /                                                                 | 85.321(2)                                                                                      | 94.686 (4)                                                        | 70.3260(10)                                                       |
| <i>β</i> , (°)                                    | 93.758(3)                                                         | 85.804(2)                                                                                      | 105.948 (3)                                                       | 87.0720(10)                                                       |
| <i>γ</i> , (°)                                    | /                                                                 | 83.152(3)                                                                                      | 92.276 (3)                                                        | 63.2750(10)                                                       |
| <i>V</i> / Å <sup>3</sup>                         | 4508.7(3)                                                         | 3198.88(16)                                                                                    | 2211.1 (7)                                                        | 2420.96(16)                                                       |
| <i>Z</i>                                          | 4                                                                 | 2                                                                                              | 2                                                                 | 2                                                                 |
| $\rho_{\text{calcd}}$ , Mg m <sup>-3</sup>        | 1.469                                                             | 1.516                                                                                          | 1.476                                                             | 1.483                                                             |
| F(000)                                            | 1984                                                              | 1476                                                                                           | 976                                                               | 1088                                                              |
| Collected refl.                                   | 23964                                                             | 56623                                                                                          | 36179                                                             | 27457                                                             |
| Unique refl.                                      | 10738                                                             | 15815                                                                                          | 10020                                                             | 9889                                                              |
| Final <i>R</i> indices, <i>I</i> > 2σ( <i>I</i> ) | <i>R</i> <sub>1</sub> (obs) = 0.053<br><i>wR</i> (all) = 0.095    | <i>R</i> <sub>1</sub> (obs) = 0.046<br><i>wR</i> (all) = 0.104                                 | <i>R</i> <sub>1</sub> (obs) = 0.045<br><i>wR</i> (all) = 0.085    | <i>R</i> <sub>1</sub> (obs) = 0.039<br><i>wR</i> (all) = 0.090    |
| GOF                                               | 1.06                                                              | 1.06                                                                                           | 1.02                                                              | 1                                                                 |
| No. of par.                                       | 552                                                               | 825                                                                                            | 542                                                               | 610                                                               |
